# Supplementary material
Source: ML conference proceedings conference paper supplement (https://openaccess.thecvf.com/content/ICCV2023/html/Qiao_March_in_Chat_ICCV_2023_paper.html)
Supplement: Supplementary file 1 [file Qiao_March_in_Chat_ICCV_2023_supplemental.pdf]

# Supplementary Material

## A. More details of HM3D-DUET

HM3D-DUET [1] is a dual-scale graph transformer with topological maps, which contains two modules: topological mapping and global action planning. The topological mapping module builds a topological map during navigation. And the global action planning module predicts the next location on the map or a stop action to end the navigation.

### A.1. Topological Mapping

To build the environment graph  $\mathcal{G}$  which is unknown initially, the mapping module updates node representations by adding the newly observed location gradually to the map. Specifically, the map denote as  $\mathcal{G}_t = \{\mathcal{V}_t, \mathcal{E}_t\}$ . At time step  $t$ , the current node  $V_t$  and its neighboring unvisited nodes  $\mathcal{N}(V_t)$  are added to  $\mathcal{V}_{t-1}$ .

The mapping module outputs the current panorama encoding with image features  $\{r_i\}_{i=1}^n$  and object features  $\{o_i\}_{i=1}^m$  and a graph with  $K$  node features  $\{v_i\}_{i=1}^K$ .

### A.2. Global Action Planning

**Dual-scale Cross-modal Encoder** The module uses dual-scale architecture transformers to capture cross-modal vision-and-language relations from different scales: a fine-scale representation of the current location and a coarse-scale representation of the map.

In the coarse-scale cross-modal encoder, the inputs are map node features  $\{v_i\}_{i=1}^K$  and textual features  $\mathcal{T}$ . The node features are embedded and combined with word embeddings into a multi-layer graph-aware cross-modal transformer to get node embedding  $\hat{v}_i$ . Then the node embedding  $\hat{v}_i$  is fed into a two-layer feed-forward network (FFN) to predict a navigation score for each node  $s_i^c$ .

In the fine-scale cross-modal encoder, the inputs are fine-grained visual representations  $\{\mathcal{R}_t, \mathcal{O}_t\}$ , the textual features  $\mathcal{T}$ , and a special stop token  $r_0$ . Then the concatenated visual tokens  $[r_0; \mathcal{R}_t; \mathcal{O}_t]$  and textual features  $\mathcal{T}$  are fed into a standard multi-layer cross-modal transformer to get  $[\hat{r}_0; \hat{R}_t; \hat{O}_t]$ . The navigation score for local-level  $s_i^f$  and object are predicted via FFN, a similar way in the coarse-scale cross-modal encoder.

Finally, the coarse-scale prediction  $s_i^c$  and fine-scale prediction  $s_i^f$  are dynamically fused to obtain the final navigation prediction  $s_i$ .

---

## Algorithm 1 March in Chat

---

### Notation Summary:

$I$ : high-level instruction in REVERIE

$\mathcal{R}_t$ : visual observation at timestep  $t$

$\mathcal{D}$ : demonstration set

$P_o$ : prompt for LLM to generate planning

LLM: large language model

Template: templates to generate natural language description

---

```

t ← 0                                ▷ Initial timestep
WI ← I
ô ← LLM(I, Po)                        ▷ Target object recognition
l̂ ← LLM(ô, Pl)                        ▷ Target location reasoning
WG ← Template(ô, l̂)                  ▷ GOSP
WS ← φ
W ← Concat(WI, WG, WS)              ▷ Assembled instruction
Pdemon ← DynamicSelect(I, D)          ▷ Dynamic demonstration
while t < max-step and ât ≠ "stop" do
    ĉroomt, ĉobjt ← CLIP(Rt)          ▷ ROASP
    if ĉroomt ≠ ĉroomt-1 then
        Pscene ← Template(ĉroomt, ĉobjt)
        Pstep ← Template(I, WS)
        PSODP ← Concat(Pscene, Pdemon, Pstep)
        Istep ← LLM(PSODP)              ▷ SODP
        WS.Append(Istep)
        W.Update(WS)                    ▷ Instruction update
    end if
    ât ← Agent(W, Rt)
    t ← t + 1
end while

```

---

tion prediction  $s_i$ .

## B. Algorithm of MiC

The algorithm of MiC pipeline is described in Algorithm 1.

## C. More Qualitative Results

We provide more examples of generated instructions in Fig. 1. And Fig. 2 shows the screenshot of the user interfaces for human study.

## D. Discussion of HANNA

HANNA [2] defines a task in an interactive setup. It builds a simulator to let the agent requests assistance for

| <b>REVERIE Instruction: Rearrange the sofa in the office.</b>                                                                                                           |                                                                                                |                                                                                                                                                                                                                |
|-------------------------------------------------------------------------------------------------------------------------------------------------------------------------|------------------------------------------------------------------------------------------------|----------------------------------------------------------------------------------------------------------------------------------------------------------------------------------------------------------------|
| <b>Scene-Oriented Dynamic Planning</b>                                                                                                                                  | <b>w/o Dynamic Demonstration</b>                                                               | <b>w/o ROASP</b>                                                                                                                                                                                               |
| Step 1: go down the stair in front of you<br>Step 2: once at the bottom enter the door<br>Step 3: stop once you enter the room<br>Step 4: rotate the sofa in the office | Step 1: select the object you want to rearrange.                                               | Step 1: go up the stairs and into the office<br>Step 2: when you get there, turn left<br>Step 3: when you get back to the top of the stairs                                                                    |
| <b>REVERIE Instruction: Dust off the picture in the lobby</b>                                                                                                           |                                                                                                |                                                                                                                                                                                                                |
| <b>Scene-Oriented Dynamic Planning</b>                                                                                                                                  | <b>w/o Dynamic Demonstration</b>                                                               | <b>w/o ROASP</b>                                                                                                                                                                                               |
| Step 1: go into the lobby<br>Step 2: find the target picture<br>Step 3: dry the back of the picture                                                                     | Step 1: go to the lobby and click on the picture                                               | Step 1 go to the stairs and up them<br>Step 2: go through the doorway on the right side<br>Step 3: go back to the staircase<br>Step 4: go through the doorway on the left side                                 |
| <b>REVERIE Instruction: Open the bathroom window.</b>                                                                                                                   |                                                                                                |                                                                                                                                                                                                                |
| <b>Scene-Oriented Dynamic Planning</b>                                                                                                                                  | <b>w/o Dynamic Demonstration</b>                                                               | <b>w/o ROASP</b>                                                                                                                                                                                               |
| Step 1: enter the bathroom through the open door<br>Step 2: walk straight<br>Step 3: stand next to the toilet                                                           | Step 1: go into the bathroom and open the door                                                 | Step 1: go inside the bathroom<br>Step 2: walk towards the mirror<br>Step 3: look at yourself in the mirror<br>Step 4: then close the door<br>Step 5: walk back outside                                        |
| <b>REVERIE Instruction: Go to the family room and clean the end table.</b>                                                                                              |                                                                                                |                                                                                                                                                                                                                |
| <b>Scene-Oriented Dynamic Planning</b>                                                                                                                                  | <b>w/o Dynamic Demonstration</b>                                                               | <b>w/o ROASP</b>                                                                                                                                                                                               |
| Step 1: walk to the family room<br>Step 2: walk to the end table<br>Step 3: wait right by table.                                                                        | Step 1: clean the end table with a damp cloth<br>Step 2: wipe down the floor with a damp cloth | Step 1: walk towards the fireplace<br>Step 2: and then go straight into the room on the right<br>Step 3: wait near the table and chair<br>Step 4: go back to the kitchen<br>Step 5: then go to the dining room |

Figure 1: Examples of generated instructions.

navigation. However, the agent just sends a signal for help when it got lost, without environmental feedback. What's more, the assistance provided by HANNA is ground truth information, which is not applicable in real-world scenarios. While in MiC, the agent could give environmental feedback in natural language, and the off-the-shelf LLM planner would correspondingly generate step-by-step instructions.

## References

- [1] Shizhe Chen, Pierre-Louis Guhur, Makarand Tapaswi, Cordelia Schmid, and Ivan Laptev. Learning from unlabeled 3d environments for vision-and-language navigation. In *ECCV*, 2022. 1
- [2] Khanh Nguyen and Hal Daumé III. Help, anna! visual navigation with natural multimodal assistance via retrospective curiosity-encouraging imitation learning. pages 684–695. *Association for Computational Linguistics*, 2019. 1

## Human Evaluation

For every question below, please rate the generated step-by-step instructions from the following two aspects.

- Relevancy: 0 (unrelated) - 3 (very related)

- Rationality: 0 (bad) - 3 (perfect)

REVERIE Instruction: Go to the lounge and empty the bin  
 Step 1: walk straight down hall into lounge  
 Step 2: stop between entry-way and garage door  
 Step 3: go up the stairs and stop at the garbage can

|                                                                                                                                                                                                    |                                                                                                                                                                                                        |
|----------------------------------------------------------------------------------------------------------------------------------------------------------------------------------------------------|--------------------------------------------------------------------------------------------------------------------------------------------------------------------------------------------------------|
| <p>Relevancy</p> <p><input type="radio"/> 0</p> <p><input type="radio"/> 1</p> <p><input checked="" type="radio"/> 2</p> <p><input type="radio"/> 3</p> <p>Your rating for the relevancy is 2.</p> | <p>Rationality</p> <p><input type="radio"/> 0</p> <p><input type="radio"/> 1</p> <p><input checked="" type="radio"/> 2</p> <p><input type="radio"/> 3</p> <p>Your rating for the rationality is 2.</p> |
|----------------------------------------------------------------------------------------------------------------------------------------------------------------------------------------------------|--------------------------------------------------------------------------------------------------------------------------------------------------------------------------------------------------------|

Figure 2: Screenshot of the user interfaces for our human study.
